# Supplementary material
Source: PubMed Central journal article supplement (PMC9912162)
Supplement: jamaophthalmol-e226253-s001.pdf [file jamaophthalmol-e226253-s001.pdf]

## Data Sharing Statement

Vasquez-Perez. Necrotizing Blepharoconjunctivitis and Keratitis in Human Monkeypox. *JAMA Ophthalmol.* Published February 09, 2023. doi:10.1001/jamaophthalmol.2022.6253

### Data

**Data available:** No
